# Supplementary material for: Community Health Worker Program Sustainability in Africa: Evidence From Costing, Financing, and Geospatial Analyses in Mali
Source: PubMed Central journal article supplement (PMC7971366; doi:10.9745/ghsp-d-20-00404), 2021-03-15
Supplement: 20-00404-Saint-Firmin-Supplement.pdf [file 20-00404-Saint-Firmin-Supplement.pdf]

**Supplement to:** Pascal Saint-Firmin P, Diakite B, Ward K, et al. Community health worker program sustainability in Africa: evidence from costing, financing, and geospatial analyses in Mali. *Glob Health Sci Pract.* 2021;9(Suppl 1). <https://doi.org/10.9745/GHSP-D-20-00404>

## Supplement

**Table S1. Type of data used, sources, and collection periods**

| Type of Data and Collection Period                                                                                                                                                                                                                                                                                                                                                                                                                                                                                                                                                                                  | Primary Sources                                                                                                                                                                                                                                                                                                                                                                                                                                                                        | Secondary Sources                                                                                                                                                                                                                                                                                                                                                                                                          |
|---------------------------------------------------------------------------------------------------------------------------------------------------------------------------------------------------------------------------------------------------------------------------------------------------------------------------------------------------------------------------------------------------------------------------------------------------------------------------------------------------------------------------------------------------------------------------------------------------------------------|----------------------------------------------------------------------------------------------------------------------------------------------------------------------------------------------------------------------------------------------------------------------------------------------------------------------------------------------------------------------------------------------------------------------------------------------------------------------------------------|----------------------------------------------------------------------------------------------------------------------------------------------------------------------------------------------------------------------------------------------------------------------------------------------------------------------------------------------------------------------------------------------------------------------------|
| <b>CHW situational analysis (September 2016 to February 2017)</b>                                                                                                                                                                                                                                                                                                                                                                                                                                                                                                                                                   |                                                                                                                                                                                                                                                                                                                                                                                                                                                                                        |                                                                                                                                                                                                                                                                                                                                                                                                                            |
| <b>Program level (regions and health districts)</b> <ul style="list-style-type: none"> <li>- Population breakdown between urban and rural areas</li> <li>- Health system levels—numbers of districts, referral health centers, community health centers, CHW village health posts</li> <li>- Current numbers and geographic distribution of CHWs</li> <li>- CHW financing sources and amounts spent for baseline year by program areas—supervision, management training, equipment, medicines and supplies, capital costs</li> <li>- Actual ratios of CHWs per population and per community or household</li> </ul> | <ul style="list-style-type: none"> <li>- Questionnaires and data collection sheets filled by: National Statistic Office, National Health Directorate, MOHSA Division of Equipment and Finance, CHW program implementing partners, Regional Health Directorates, local authorities</li> <li>- Interviews with ECC national manager, ECC regional and district managers, head of Health Facilities Regulation Division, Drug and Pharmacy Director, health districts managers</li> </ul> | <ul style="list-style-type: none"> <li>- Baseline year reports from CHW implementing partners, local health information system, national health accounts, ECC national reviews, regional ECC managers</li> <li>- Mali Demographic Health Survey (fifth edition)</li> <li>- Health area microplanning monitoring guide (2014)</li> </ul>                                                                                    |
| <b>Costing of CHW provided services (February to April 2017)</b>                                                                                                                                                                                                                                                                                                                                                                                                                                                                                                                                                    |                                                                                                                                                                                                                                                                                                                                                                                                                                                                                        |                                                                                                                                                                                                                                                                                                                                                                                                                            |
| <b>Country-level (baseline year)</b> <ul style="list-style-type: none"> <li>- National and sub-national population figures and growth rate</li> <li>- Population breakdown by gender and age groups</li> <li>- Annual inflation rate</li> <li>- Average number of persons per household</li> <li>- Currency exchange rate</li> </ul>                                                                                                                                                                                                                                                                                | <ul style="list-style-type: none"> <li>- Interview with head of statistics office of Mali National Statistic Office</li> </ul>                                                                                                                                                                                                                                                                                                                                                         | <ul style="list-style-type: none"> <li>-Mali general population census 2009</li> </ul>                                                                                                                                                                                                                                                                                                                                     |
| <b>CHW cadre</b> <ul style="list-style-type: none"> <li>- Normative ratios of CHWs per population and household</li> <li>- CHW expected attrition rates</li> <li>- Expected CHW working hours</li> <li>- Salary/stipend and benefits</li> </ul>                                                                                                                                                                                                                                                                                                                                                                     | <ul style="list-style-type: none"> <li>- MOHSA human resources directorate records</li> <li>- Consultative meetings with expert panel</li> </ul>                                                                                                                                                                                                                                                                                                                                       | <ul style="list-style-type: none"> <li>- National ECC implementation guide (December 2015)</li> <li>- MOH district-level records</li> <li>- Local Health Information System report for baseline year</li> <li>- Mali Demographic Health Survey 2013, 2018</li> <li>- GOM reference price listing for goods and services for 2015</li> <li>- CHW standardized treatment chart for childhood sickness (June 2016)</li> </ul> |
| <b>Supervision and program management</b> <ul style="list-style-type: none"> <li>- Normative ratios of CHWs per supervisor and manager</li> <li>- Expected time for CHW supervision and program management</li> <li>- Salary and benefits</li> <li>- Expected frequency, numbers, and costs of supervision visits and meetings per year</li> <li>- Expected frequency, numbers, and costs of management meetings per year</li> </ul>                                                                                                                                                                                |                                                                                                                                                                                                                                                                                                                                                                                                                                                                                        |                                                                                                                                                                                                                                                                                                                                                                                                                            |

| Type of Data and Collection Period                                                                                                                                                                                                                                                                                                                                                                                                                                                           | Primary Sources | Secondary Sources                                                                                                                      |
|----------------------------------------------------------------------------------------------------------------------------------------------------------------------------------------------------------------------------------------------------------------------------------------------------------------------------------------------------------------------------------------------------------------------------------------------------------------------------------------------|-----------------|----------------------------------------------------------------------------------------------------------------------------------------|
| <b>ECC package, number, and types of services delivered</b> <ul style="list-style-type: none"> <li>- List of services provided by CHWs grouped by health area/program type</li> <li>- Type of services – counseling, malaria treatment, referral, and other.</li> <li>- Target population group for each service</li> <li>- Incidence, prevalence, and expected utilization rates for each service</li> <li>- Actual number of services provided in the baseline year of analysis</li> </ul> |                 |                                                                                                                                        |
| <b>Training</b> <ul style="list-style-type: none"> <li>- Training session types (for CHWs, supervisors, and managers), expected frequency, number of participants, and costs</li> </ul>                                                                                                                                                                                                                                                                                                      |                 |                                                                                                                                        |
| <b>Equipment</b> <ul style="list-style-type: none"> <li>- Equipment expected quantities, unit costs, and replacement frequency for CHWs, supervisors, and managers</li> </ul>                                                                                                                                                                                                                                                                                                                |                 |                                                                                                                                        |
| <b>Medicines</b> <ul style="list-style-type: none"> <li>- Expected unit costs and unit mark up for the types of medicine and supplies included in standard treatment guides</li> </ul>                                                                                                                                                                                                                                                                                                       |                 |                                                                                                                                        |
| <b>Capital costs</b> <ul style="list-style-type: none"> <li>- Description of assets, expected quantities, replacement frequency, and costs</li> </ul>                                                                                                                                                                                                                                                                                                                                        |                 |                                                                                                                                        |
| <b>Standard treatment guidelines</b> <ul style="list-style-type: none"> <li>- For each service provided by CHWs: description, target population, time per service, and quantities of tests, medicines, and supplies</li> </ul>                                                                                                                                                                                                                                                               |                 |                                                                                                                                        |
| <b>District-level cost efficiencies, geospatial mapping, and analysis (March to June 2019)</b>                                                                                                                                                                                                                                                                                                                                                                                               |                 |                                                                                                                                        |
| <b>Calculated estimates</b> <ul style="list-style-type: none"> <li>- Normative cost per CHW service</li> <li>- Number of services per person in target population by type of service in baseline year</li> </ul>                                                                                                                                                                                                                                                                             | Authors         | N/A                                                                                                                                    |
| <b>Geospatial data</b> <ul style="list-style-type: none"> <li>- Geocoded villages; administrative boundaries for health districts, municipalities, and communes; population</li> </ul>                                                                                                                                                                                                                                                                                                       | N/A             | <ul style="list-style-type: none"> <li>- Mali CHW Mapping tool database</li> <li>- UNOCHA Humanitarian Data Exchange Portal</li> </ul> |
| <b>Geospatial mapping outputs</b> <ul style="list-style-type: none"> <li>- Thiessen polygons for CHW covered villages</li> <li>- Point, choropleth, and Euclidean distance maps</li> </ul>                                                                                                                                                                                                                                                                                                   | Authors         | N/A                                                                                                                                    |

## Expert Panel Member Profile

**1. Institution represented:** National Directorate of Health

**Position:** ECC/CHW National Program Manager

**Health System Level-Location:** Central Government-Bamako

**Relevance:** Provided design and validation of national ECC/CHW related strategic documents such as *ECC National Strategic Plan 2016-2020* and Implementation Guide. Responsible for overseeing regulatory and normative decisions, overarching coordination and programmatic planning (service expansion, CHW recruitment and deployment) with national and international community health stakeholders.

**2. Institution represented:** National Directorate of Health

**Position:** ECC/CHW Deputy National Manager

**Health System Level-Location:** Central Government-Bamako

**Relevance:** Led data collection field visits with the study team. Program data, including CHW funding source, workforce and service utilization were gathered directly in the regions and from implementing partners.

**3. Institution represented:** Directorate of Pharmacy and Medicine

**Position:** Quality Assurance Office Chief

**Health System Level-Location:** Central Government-Bamako

**Relevance:** Oversees supply chain management, and distribution and quality assurance of medicines for the ECC program. Serves as the liaison authority with regional directorate of health offices for CHW-provided medicines.

**4. Institution represented:** Directorate of Pharmacy and Medicine

**Position:** Supply Chain and Distribution Officer

**Health System Level-Location:** Central Government-Bamako

**Relevance:** Oversees supply chain management, distribution and quality assurance of medicines for the ECC program. Serves as the liaison authority with regional directorate of health offices for CHW-provided medicines.

**5, 6, 7. Institution represented:** Regional Directorate of Health

**Position:** ECC/CHW Program Regional Manager

**Health System Level-Location:** Regional-Sikasso, Regional-Mopti, Regional-Kayes

**Relevance:** ECC regional managers are dedicated primarily to ECC/CHW activities. They form the technical arm of the MOHSA and are heavily involved in data management and reporting, determination of training needs for CHWs, production and revision of ECC normative documents (e.g. CHW standardized treatment sheet for sick children), training curriculum and supervision norms and guidelines for CHWs, among other things.

**8. Institution represented:** Regional Directorate of Health

**Position:** ECC/CHW Regional Manager

**Health System Level-Location:** Regional-Segou

**Relevance:** In addition to the general responsibilities of ECC regional managers mentioned above, the study team has received particularly helpful support from the Segou office. A field visit was conducted in Segou in June 2017 with the regional manager of the ECC National Program to directly observe a CHW at work. Although not representative, this visit provided more insights to the study team during expert panel consultative meetings.

**9. Institution represented:** Regional Directorate of Health

**Position:** ECC/CHW Program Regional Manager

**Health System Level-Location:** Regional-Koulikoro

**Relevance:** In addition to the general responsibilities of ECC regional managers mentioned above, the study team received particularly helpful inputs from the Koulikoro office that had conducted similar work related to estimation of time required. Provision time required for each ECC service was recorded using direct observation of randomly selected CHWs. These inputs contributed to increasing the validity of the estimates coming out of the consultative meetings with the expert panel.

**10. Institution represented:** District Health Management Team

**Position:** ECC/CHW Program District Manager

**Health System Level-Location:** District-Kati

**Relevance:** Referral health centers are the immediate reference level for CHCs to which CHWs are affiliated. Together with the district management team, they share clinical and public health functions to provide technical supervision of the CHC including CHWs.

**11. Institution represented:** Community Health Center

**Position:** Technical Director

**Health System Level-Location:** Communal-Safo Commune

**Relevance:** Representing the most immediate authority for CHWs and expected to conduct routine supervisions.

Experts were chosen based on their ability to exercise legitimate authority over or influence on one of the following: the choice of CHW location, recruitment and training needs, stakeholder coordination, key program management functions (supply of medicines and equipment, statistical reporting, and supervision), and regulatory and normative decisions. The expert panel information table provides a more detailed understanding of members' profiles looking at the institution and health system level represented, their position and relevance as community health experts. We did not seek individual authorizations from the expert panel members, who will remain anonymous. The table lists only positions and institution represented at the time of the study.

**Table S2. ECC Services Costing Outputs**

| Type of service                            | Target population            | Number of services provided | Number of services needed [1] | Coverage of needs(%) [2] | Unit cost breakdown (US\$) |                            |                                          |                          |                                         | Total time required to provide services (hours) [6] | Time available spent on service (%) [7] | Total cost in US\$ (Share of total cost in %) |
|--------------------------------------------|------------------------------|-----------------------------|-------------------------------|--------------------------|----------------------------|----------------------------|------------------------------------------|--------------------------|-----------------------------------------|-----------------------------------------------------|-----------------------------------------|-----------------------------------------------|
|                                            |                              |                             |                               |                          | Cost per service           | CHW labor cost per service | Supply and medicine cost per service [3] | Indirect salary costs[4] | All other indirect costs per service[5] |                                                     |                                         |                                               |
| <b>Curative services</b>                   |                              |                             |                               |                          |                            |                            |                                          |                          |                                         |                                                     |                                         |                                               |
| Curative consultation                      | Children <5 years            | 229,593                     | 1,212,487                     | 18.9%                    | 2.38                       | 0.08                       | 0.07                                     | 0.50                     | 1.72                                    | 57,398                                              | 1.31%                                   | 545,898 (6.5%)                                |
| Malaria rapid screening test               | Children <5 years            | 167,698                     | 533,494                       | 31.4%                    | 3.82                       | 0.10                       | 0.74                                     | 0.67                     | 2.29                                    | 55,899                                              | 1.28%                                   | 639,847 (7.7%)                                |
| Uncomplicated malaria management           | Children <5 years            | 122,706                     | 3,031,219                     | 4.0%                     | 6.76                       | 0.11                       | 3.38                                     | 0.74                     | 2.52                                    | 44,992                                              | 1.03%                                   | 829,141 (9.9%)                                |
| Referrals for episode of severe malaria    | Children <5 years            | 10,327                      | 142,666                       | 7.2%                     | 2.31                       | 0.08                       | 0.003                                    | 0.50                     | 1.72                                    | 2,582                                               | 0.06%                                   | 23,814 (0.3%)                                 |
| Diarrhea management                        | Children 6-59 months         | 43,584                      | 2,182,476                     | 2.0%                     | 3.39                       | 0.10                       | 0.32                                     | 0.67                     | 2.29                                    | 14,528                                              | 0.33%                                   | 147,652 (1.8%)                                |
| Pneumonia management                       | Children 6-59 months         | 35,601                      | 1,091,238                     | 3.3%                     | 2.75                       | 0.08                       | 0.45                                     | 0.50                     | 1.72                                    | 8,900                                               | 0.20%                                   | 97,942 (1.2%)                                 |
| Cough and cold management                  | Children 6-59 months         | 49,728                      | 2,182,476                     | 2.3%                     | 3.90                       | 0.09                       | 1.14                                     | 0.61                     | 2.06                                    | 14,918                                              | 0.34%                                   | 194,120 (2.3%)                                |
| Moderate acute malnutrition management     | Children >1 year to <5 years | 36,916                      | 109,858                       | 33.6%                    | 33.84                      | 0.31                       | 24.63                                    | 2.02                     | 6.88                                    | 36,916                                              | 0.85%                                   | 1,249,206 (14.9%)                             |
| Other curative management                  | Children <5 years            | 8,324                       | 1,212,487                     | 0.7%                     | 2.30                       | 0.08                       | 0.00                                     | 0.50                     | 1.72                                    | 2,081                                               | 0.05%                                   | 19,172 (0.2%)                                 |
| <b>Preventive services</b>                 |                              |                             |                               |                          |                            |                            |                                          |                          |                                         |                                                     |                                         |                                               |
| Newborn follow-up                          | Newborns                     | 80,863                      | 1,454,172                     | 5.6%                     | 3.07                       | 0.10                       | 0.003                                    | 0.67                     | 2.29                                    | 26,954                                              | 0.62%                                   | 248,554 (3%)                                  |
| Education on lactational amenorrhea method | Females of reproductive age  | 12,537                      | 183,622                       | 6.8%                     | 3.84                       | 0.13                       | 0.004                                    | 0.84                     | 2.87                                    | 5,224                                               | 0.12%                                   | 48,173 (0.6%)                                 |
| Oral contraceptives (pill) provision       | Females of reproductive age  | 15,502                      | 227,050                       | 6.8%                     | 4.68                       | 0.13                       | 0.84                                     | 0.84                     | 2.87                                    | 6,459                                               | 0.15%                                   | 72,578 (0.9%)                                 |

| Type of service                              | Target population           | Number of services provided | Number of services needed [1] | Coverage of needs(%) [2] | Unit cost breakdown (US\$) |                            |                                          |                          |                                         | Total time required to provide services (hours) [6] | Time available spent on service (%) [7] | Total cost in US\$ (Share of total cost in %) |
|----------------------------------------------|-----------------------------|-----------------------------|-------------------------------|--------------------------|----------------------------|----------------------------|------------------------------------------|--------------------------|-----------------------------------------|-----------------------------------------------------|-----------------------------------------|-----------------------------------------------|
|                                              |                             |                             |                               |                          | Cost per service           | CHW labor cost per service | Supply and medicine cost per service [3] | Indirect salary costs[4] | All other indirect costs per service[5] |                                                     |                                         |                                               |
| Male condom distribution                     | Females of reproductive age | 9,245                       | 138,219                       | 6.7%                     | 1.81                       | 0.05                       | 0.28                                     | 0.34                     | 1.15                                    | 1,541                                               | 0.04%                                   | 16,777 (0.2%)                                 |
| Female condom distribution                   | Females of reproductive age | 188                         | 2,763                         | 6.8%                     | 2.37                       | 0.05                       | 0.84                                     | 0.34                     | 1.15                                    | 31                                                  | 0.00%                                   | 446 (0.01%)                                   |
| Standard day method cycle beads distribution | Females of reproductive age | 309                         | 752                           | 41.1%                    | 1.86                       | 0.05                       | 0.33                                     | 0.34                     | 1.15                                    | 52                                                  | 0.001%                                  | 575 (0.01%)                                   |
| Spermicide-based contraceptives distribution | Females of reproductive age | 51                          | 4,526                         | 1.1%                     | 4.33                       | 0.05                       | 2.79                                     | 0.34                     | 1.15                                    | 9                                                   | 0.0002%                                 | 221 (0.003%)                                  |
| Provision of contraceptive injections        | Females of reproductive age | 58,421                      | 855,687                       | 6.8%                     | 1.14                       | 0.03                       | 0.37                                     | 0.17                     | 0.57                                    | 4,868                                               | 0.11%                                   | 66,600 (0.8%)                                 |
| Referrals for family planning                | Females of reproductive age | 1,332                       | 19,517                        | 6.8%                     | 2.31                       | 0.08                       | 0.003                                    | 0.50                     | 1.72                                    | 333                                                 | 0.01%                                   | 3,072 (0.04%)                                 |
| <b>Promotive services</b>                    |                             |                             |                               |                          |                            |                            |                                          |                          |                                         |                                                     |                                         |                                               |
| Home visits                                  | Household                   | 120,282                     | 181,203                       | 66.4%                    | 6.15                       | 0.21                       | 0.004                                    | 1.35                     | 4.59                                    | 80,188                                              | 1.84%                                   | 739,212 (8.8%)                                |
| Health educational talks                     | Adults >15 years            | 123,520                     | 1,711,5136                    | 0.7%                     | 9.22                       | 0.31                       | 0.004                                    | 2.02                     | 6.88                                    | 123,520                                             | 2.83%                                   | 1,138,438 (13.6%)                             |
| Family planning counseling                   | Females of reproductive age | 68,228                      | 501,520                       | 13.6%                    | 2.31                       | 0.08                       | 0.004                                    | 0.50                     | 1.72                                    | 17,057                                              | 0.39%                                   | 157,399 (1.9%)                                |
| Demand generation                            | Females of reproductive age | 17,127                      | 501,520                       | 3.4%                     | 9.22                       | 0.31                       | 0.004                                    | 2.02                     | 6.88                                    | 17,127                                              | 0.39%                                   | 15,7853 (1.9%)                                |
| <b>Monitoring and evaluation</b>             |                             |                             |                               |                          |                            |                            |                                          |                          |                                         |                                                     |                                         |                                               |
| Activity reporting                           | N/A                         | 26,244                      | N/A                           | N/A                      | 74.82                      | 2.50                       | 1.12                                     | 16.16                    | 55.05                                   | 209,952                                             | 4.8%                                    | 1,963,577 (23.5%)                             |

- [1] Expected number of services is based on the prevalence of the different conditions within the target population that would require use of CHW services.
- [2] estimated by dividing the actual number of services provided by the expected number of services
- [3] An average percentage mark-up on medicines for transport, storage, management, and distribution was determined by the CHW expert panel and applied to each unit cost to account for difficulties in terrain or reach across regions
- [4] Indirect salary represents the labor cost for time spent by each CHW outside direct service provision.
- [5] Other indirect costs include equipment, labor time for program management and CHW supervision, meetings, training, and supervision visits.
- [6] Total time required to provide each service is calculated by multiplying the expected time spent on service (in mn) by the reported service volume for the year. The estimates are then converted in CHW hours.
- [7] Percentage of CHW time available spent on services is calculated by dividing the total time required to provide the services reported for the year and the total time available for providing ECC. Availability per year for providing the ECC package is calculated by multiplying 48 hours of CHW standard work time per week by 52 weeks. Time spent on recurrent meetings, training, campaigns, and travel, estimated at 20% of total available work time, was excluded. This information was provided by a national CHW expert panel that included program managers and CHW supervisors from the MOHSA and implementing partners.



**Figure S1: Geographic distribution of health facilities in the southern five regions**

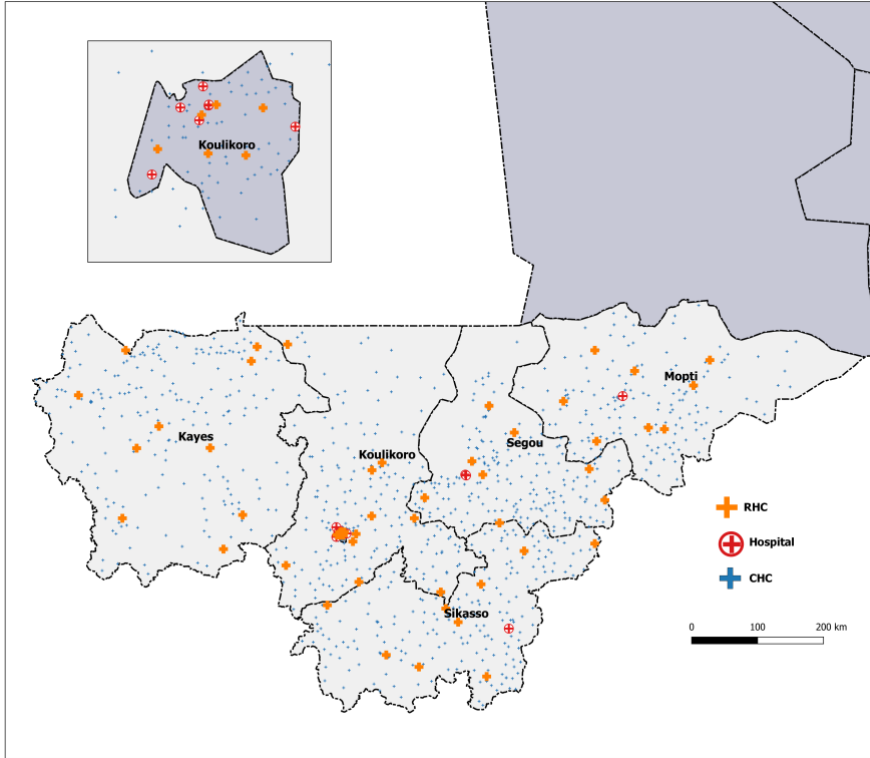

**Figure S2: Proximity between CHW-covered villages and distribution of non-covered villages**

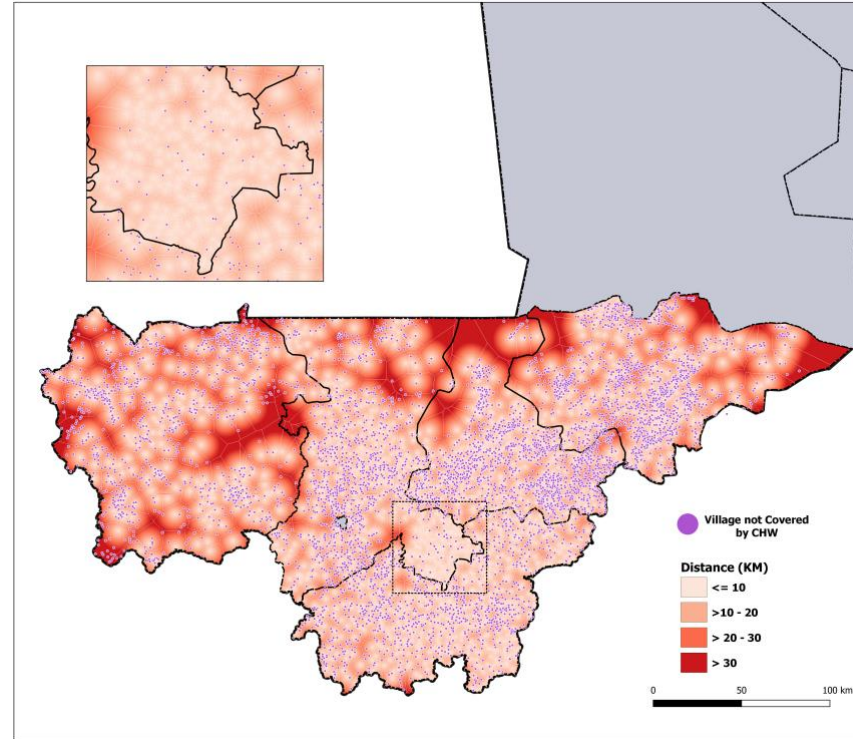

Community health centers are the entry point into the health system, reflected in Figure S1, indicating that there are more CHCs than referral facilities and hospitals. Location data (distance and proximity) used in geospatial targeting can provide useful options on how to expand existing services with funding surplus available for reallocation. Figure S2 provides an additional application of location-based and Euclidean distance mapping analytics. The associated map displays the locations of all non-covered villages and the Euclidean distance—the distance “as the crow flies”—to the nearest covered village. Light areas represent covered villages closer to each other, helping to visually follow CHW program presence across the five regions. These areas can be interpreted as having higher program activity and help visualize the current scale of the program, and how well it reached the population. Some non-covered villages are located in areas benefiting from a higher program presence, and others are over 30 km away from the closest CHW-covered village. Reaching non-covered villages located in areas with higher program presence may be easier to achieve from an operational and logistical standpoint. Such application offers a good example of how stronger program presence/proximity and operations could be leveraged as a way to guide progressive expansion with potentially less distance-based logistical challenges on the supply side. On the demand side, CHW program managers and stakeholders could consider adapting our example to similar Euclidean space analysis used in market segmentation approaches placing groups of consumers/users sharing similar product preferences and characteristics that are located

close to one another. Exploring and extracting these market segments characteristics or preferences from consumer/user data was not, however, the focus of our study and considered beyond its scope.

**Table S3: Technical and Allocative Efficiency Gaps**

| Health District  | Rural Population | Covered Population | Number of CHW | Average Spending per CHW | Actual Spending on Covered Population | Normative Cost for Covered Population | Technical Efficiency Surplus (Deficit) | Normative Cost for Rural Population | Allocative Efficiency Surplus (Deficit) |
|------------------|------------------|--------------------|---------------|--------------------------|---------------------------------------|---------------------------------------|----------------------------------------|-------------------------------------|-----------------------------------------|
|                  | [A]              | [B]                | [C]           | [D]                      | [E] = [C] x [D]                       | [F]                                   | [G] = [E] - [F]                        | [H] = [F] / [B] x [A]               | [I] = [E] - [H]                         |
| <b>Kayes</b>     |                  |                    |               |                          |                                       |                                       |                                        |                                     |                                         |
| Kayes            | 210,228          | 61,361             | 45            | 9,213                    | 414,605                               | 196,306                               | 218,299                                | 672,560                             | (257,955)                               |
| Bafoulabe        | 77,332           | 33,009             | 34            | 9,213                    | 313,257                               | 99,135                                | 214,122                                | 232,249                             | 81,008                                  |
| Diema            | 99,199           | 36,222             | 27            | 9,213                    | 248,763                               | 184,383                               | 64,380                                 | 504,959                             | (256,197)                               |
| Kenieba          | 106,732          | 18,313             | 14            | 9,213                    | 128,988                               | 46,319                                | 82,669                                 | 269,959                             | (140,971)                               |
| Kita             | 267,635          | 82,779             | 82            | 9,213                    | 755,502                               | 117,567                               | 637,935                                | 380,108                             | 375,395                                 |
| Nioro            | 102,444          | 14,554             | 8             | 9,213                    | 73,708                                | 36,937                                | 36,770                                 | 259,999                             | (186,291)                               |
| Yelimane         | 42,043           | 14,584             | 13            | 9,213                    | 119,775                               | 21,982                                | 97,793                                 | 63,370                              | 56,405                                  |
| Oussoubidiagna   | 55,676           | 25,957             | 25            | 9,213                    | 230,336                               | 49,890                                | 180,445                                | 107,012                             | 123,324                                 |
| <b>Koulikoro</b> |                  |                    |               |                          |                                       |                                       |                                        |                                     |                                         |
| Banamba          | 117,033          | 97,650             | 74            | 4,480                    | 331,542                               | 98,945                                | 232,596                                | 118,585                             | 212,956                                 |
| Dioila           | 196,313          | 109,345            | 113           | 4,480                    | 506,273                               | 316,284                               | 189,989                                | 567,841                             | (61,568)                                |
| Fana             | 127,656          | 89,678             | 50            | 4,480                    | 224,015                               | 157,729                               | 66,286                                 | 224,525                             | (511)                                   |
| Kalabancoro      | 113,971          | 95,146             | 29            | 4,480                    | 129,928                               | 70,170                                | 59,758                                 | 84,054                              | 45,875                                  |
| Kangaba          | 47,764           | 57,128             | 36            | 4,480                    | 161,291                               | 95,109                                | 66,181                                 | 79,520                              | 81,771                                  |
| Kati             | 222,161          | 89,895             | 44            | 4,480                    | 197,133                               | 28,554                                | 168,578                                | 70,568                              | 126,565                                 |
| Kolokani         | 186,546          | 92,651             | 49            | 4,480                    | 219,534                               | 25,312                                | 194,223                                | 50,963                              | 168,571                                 |
| Koulikoro        | 119,975          | 99,642             | 60            | 4,480                    | 268,818                               | 44,986                                | 223,831                                | 54,166                              | 214,651                                 |

|               |         |         |    |       |         |         |         |         |           |
|---------------|---------|---------|----|-------|---------|---------|---------|---------|-----------|
| Nara          | 197,922 | 47,469  | 43 | 4,480 | 192,653 | 44,191  | 148,461 | 184,256 | 8,396     |
| Ouesselbougou | 147,699 | 90,678  | 28 | 4,480 | 125,448 | 84,325  | 41,123  | 137,351 | (11,903)  |
| <b>Mopti</b>  |         |         |    |       |         |         |         |         |           |
| Bandiagara    | 204,176 | 109,965 | 38 | 8,329 | 316,509 | 122,753 | 193,756 | 227,921 | 88,589    |
| Bankass       | 184,552 | 87,899  | 55 | 8,329 | 458,105 | 225,249 | 232,856 | 472,932 | (14,826)  |
| Djenne        | 118,948 | 77,697  | 27 | 8,329 | 224,888 | 128,770 | 96,118  | 197,137 | 27,751    |
| Douentza      | 180,102 | 60,740  | 42 | 8,329 | 349,826 | 158,172 | 191,654 | 469,000 | (119,174) |
| Koro          | 162,109 | 156,524 | 45 | 8,329 | 374,813 | 134,153 | 240,661 | 138,939 | 235,874   |
| Mopti         | 150,579 | 82,683  | 33 | 8,329 | 274,863 | 97,953  | 176,910 | 178,389 | 96,474    |
| Tenenkou      | 95,464  | 47,295  | 29 | 8,329 | 241,546 | 78,988  | 162,559 | 159,435 | 82,112    |
| Youwarou      | 85,556  | 57,458  | 36 | 8,329 | 299,851 | 100,551 | 199,300 | 149,722 | 150,128   |
| <b>Segou</b>  |         |         |    |       |         |         |         |         |           |
| Segou         | 301,301 | 96,546  | 81 | 4,414 | 357,547 | 173,522 | 184,025 | 541,528 | (183,981) |
| Baroueli      | 108,779 | 41,085  | 35 | 4,414 | 154,496 | 89,917  | 64,579  | 238,068 | (83,573)  |
| Bla           | 167,030 | 100,322 | 47 | 4,414 | 207,466 | 125,238 | 82,228  | 208,514 | (1,048)   |
| Macina        | 163,530 | 100,525 | 54 | 4,414 | 238,365 | 106,333 | 132,032 | 172,978 | 65,387    |
| Markala       | 25,757  | 97,685  | 74 | 4,414 | 326,648 | 155,812 | 170,836 | 41,083  | 285,565   |
| Niono         | 154,060 | 87,426  | 40 | 4,414 | 176,566 | 102,243 | 74,323  | 180,170 | (3,604)   |
| San           | 181,704 | 100,703 | 65 | 4,414 | 286,921 | 145,182 | 141,739 | 261,960 | 24,961    |
| Tominian      | 178,986 | 88,059  | 52 | 4,414 | 229,536 | 119,484 | 110,053 | 242,859 | (13,323)  |
|               |         |         |    |       |         |         |         |         |           |

| Sikasso    |         |         |     |       |         |         |           |           |           |
|------------|---------|---------|-----|-------|---------|---------|-----------|-----------|-----------|
| Bougouni   | 346,208 | 151,813 | 146 | 4,739 | 691,943 | 497,787 | 194,156   | 1,135,197 | (443,255) |
| Kadiolo    | 127,615 | 53,337  | 72  | 4,739 | 341,232 | 360,615 | (19,383)  | 862,814   | (521,582) |
| Kignan     | 91,422  | 37,969  | 52  | 4,739 | 246,445 | 170,224 | 76,221    | 409,867   | (163,422) |
| Kolondieba | 164,598 | 71,600  | 81  | 4,739 | 383,886 | 354,668 | 29,218    | 815,331   | (431,445) |
| Koutiala   | 317,519 | 105,867 | 92  | 4,739 | 436,019 | 188,376 | 247,643   | 564,981   | (128,962) |
| Niena      | 93,608  | 35,123  | 50  | 4,739 | 236,967 | 159,705 | 77,262    | 425,636   | (188,669) |
| Selingue   | 31,132  | 13,542  | 18  | 4,739 | 85,308  | 93,259  | (7,951)   | 214,395   | (129,087) |
| Sikasso    | 245,991 | 90,253  | 76  | 4,739 | 360,189 | 250,157 | 110,033   | 681,820   | (321,631) |
| Yanfolila  | 76,355  | 33,214  | 35  | 4,739 | 165,877 | 120,490 | 45,386    | 276,993   | (111,116) |
| Yorosso    | 127,896 | 55,635  | 38  | 4,739 | 180,095 | 419,313 | (239,218) | 963,934   | (783,839) |

**Table S3 (rev): Technical and Allocative Efficiency Gaps**

| Health District  | Rural Population | Covered Population | Number of CHW | Average Spending per CHW, US\$ | Actual Spending on Covered Population, US\$ | Normative Cost for Covered Population, US\$ | Technical Efficiency Surplus (Deficit), US\$ | Normative Cost for Rural Population, US\$ | Allocative Efficiency Surplus (Deficit), US\$ |
|------------------|------------------|--------------------|---------------|--------------------------------|---------------------------------------------|---------------------------------------------|----------------------------------------------|-------------------------------------------|-----------------------------------------------|
|                  | [A]              | [B]                | [C]           | [D]                            | [E] = [C] x [D]                             | [F]                                         | [G] = [E] - [F]                              | [H] = [F] / [B] x [A]                     | [I] = [E] - [H]                               |
| <b>Kayes</b>     |                  |                    |               |                                |                                             |                                             |                                              |                                           |                                               |
| Kayes            | 210,228          | 61,361             | 45            | 9,213.44                       | 414,604.77                                  | 196,305.62                                  | 218,299.15                                   | 672,559.72                                | (257,954.96)                                  |
| Bafoulabe        | 77,332           | 33,009             | 34            | 9,213.44                       | 313,256.94                                  | 99,135.01                                   | 214,121.93                                   | 232,249.03                                | 81,007.91                                     |
| Diema            | 99,199           | 36,222             | 27            | 9,213.44                       | 248,762.86                                  | 184,383.31                                  | 64,379.55                                    | 504,959.41                                | (256,196.55)                                  |
| Kenieba          | 106,732          | 18,313             | 14            | 9,213.44                       | 128,988.15                                  | 46,319.44                                   | 82,668.71                                    | 269,959.42                                | (140,971.27)                                  |
| Kita             | 267,635          | 82,779             | 82            | 9,213.44                       | 755,502.02                                  | 117,566.54                                  | 637,935.49                                   | 380,107.51                                | 375,394.51                                    |
| Nioro            | 102,444          | 14,554             | 8             | 9,213.44                       | 73,707.51                                   | 36,937.50                                   | 36,770.02                                    | 259,998.97                                | (186,291.46)                                  |
| Yelimane         | 42,043           | 14,584             | 13            | 9,213.44                       | 119,774.71                                  | 21,981.85                                   | 97,792.86                                    | 63,369.65                                 | 56,405.06                                     |
| Oussoubidiagna   | 55,676           | 25,957             | 25            | 9,213.44                       | 230,335.98                                  | 49,890.50                                   | 180,445.48                                   | 107,011.73                                | 123,324.26                                    |
| <b>Koulikoro</b> |                  |                    |               |                                |                                             |                                             |                                              |                                           |                                               |
| Banamba          | 117,033          | 97,650             | 74            | 4,480.29                       | 331,541.59                                  | 98,945.10                                   | 232,596.49                                   | 118,585.17                                | 212,956.42                                    |
| Dioila           | 196,313          | 109,345            | 113           | 4,480.29                       | 506,272.97                                  | 316,283.59                                  | 189,989.37                                   | 567,841.06                                | (61,568.09)                                   |
| Fana             | 127,656          | 89,678             | 50            | 4,480.29                       | 224,014.59                                  | 157,728.56                                  | 66,286.02                                    | 224,525.49                                | (510.91)                                      |
| Kalabancoro      | 113,971          | 95,146             | 29            | 4,480.29                       | 129,928.46                                  | 70,170.42                                   | 59,758.04                                    | 84,053.90                                 | 45,874.56                                     |
| Kangaba          | 47,764           | 57,128             | 36            | 4,480.29                       | 161,290.50                                  | 95,109.41                                   | 66,181.09                                    | 79,519.78                                 | 81,770.73                                     |
| Kati             | 222,161          | 89,895             | 44            | 4,480.29                       | 197,132.84                                  | 28,554.41                                   | 168,578.43                                   | 70,567.62                                 | 126,565.22                                    |
| Kolokani         | 186,546          | 92,651             | 49            | 4,480.29                       | 219,534.30                                  | 25,311.73                                   | 194,222.57                                   | 50,963.31                                 | 168,570.99                                    |
| Koulikoro        | 119,975          | 99,642             | 60            | 4,480.29                       | 268,817.50                                  | 44,986.19                                   | 223,831.32                                   | 54,166.09                                 | 214,651.41                                    |
| Nara             | 197,922          | 47,469             | 43            | 4,480.29                       | 192,652.54                                  | 44,191.41                                   | 148,461.13                                   | 184,256.09                                | 8,396.45                                      |
| Ouellesbougou    | 147,699          | 90,678             | 28            | 4,480.29                       | 125,448.17                                  | 84,325.23                                   | 41,122.94                                    | 137,351.41                                | (11,903.25)                                   |
| <b>Mopti</b>     |                  |                    |               |                                |                                             |                                             |                                              |                                           |                                               |
| Bandiagara       | 204,176          | 109,965            | 38            | 8,329.19                       | 316,509.04                                  | 122,753.30                                  | 193,755.74                                   | 227,920.51                                | 88,588.54                                     |
| Bankass          | 184,552          | 87,899             | 55            | 8,329.19                       | 458,105.20                                  | 225,249.33                                  | 232,855.87                                   | 472,931.59                                | (14,826.39)                                   |

|                |         |         |     |          |            |            |              |              |              |
|----------------|---------|---------|-----|----------|------------|------------|--------------|--------------|--------------|
| Djenne         | 118,948 | 77,697  | 27  | 8,329.19 | 224,888.00 | 128,770.33 | 96,117.67    | 197,137.26   | 27,750.75    |
| Douentza       | 180,102 | 60,740  | 42  | 8,329.19 | 349,825.79 | 158,171.67 | 191,654.11   | 468,999.58   | (119,173.80) |
| Koro           | 162,109 | 156,524 | 45  | 8,329.19 | 374,813.34 | 134,152.64 | 240,660.71   | 138,939.39   | 235,873.95   |
| Mopti          | 150,579 | 82,683  | 33  | 8,329.19 | 274,863.12 | 97,953.27  | 176,909.84   | 178,388.62   | 96,474.50    |
| Tenenkou       | 95,464  | 47,295  | 29  | 8,329.19 | 241,546.38 | 78,987.59  | 162,558.79   | 159,434.85   | 82,111.52    |
| Youwarou       | 85,556  | 57,458  | 36  | 8,329.19 | 299,850.67 | 100,551.13 | 199,299.54   | 149,722.45   | 150,128.22   |
| <b>Segou</b>   |         |         |     |          |            |            |              |              |              |
| Segou          | 301,301 | 96,546  | 81  | 4,414.16 | 357,547.15 | 173,522.07 | 184,025.09   | 541,528.10   | (183,980.95) |
| Baroueli       | 108,779 | 41,085  | 35  | 4,414.16 | 154,495.68 | 89,916.55  | 64,579.14    | 238,068.20   | (83,572.51)  |
| Bla            | 167,030 | 100,322 | 47  | 4,414.16 | 207,465.63 | 125,238.08 | 82,227.55    | 208,513.76   | (1,048.13)   |
| Macina         | 163,530 | 100,525 | 54  | 4,414.16 | 238,364.77 | 106,332.76 | 132,032.01   | 172,977.83   | 65,386.94    |
| Markala        | 25,757  | 97,685  | 74  | 4,414.16 | 326,648.02 | 155,811.55 | 170,836.46   | 41,083.46    | 285,564.55   |
| Niono          | 154,060 | 87,426  | 40  | 4,414.16 | 176,566.50 | 102,243.14 | 74,323.36    | 180,170.41   | (3,603.91)   |
| San            | 181,704 | 100,703 | 65  | 4,414.16 | 286,920.55 | 145,181.84 | 141,738.71   | 261,959.64   | 24,960.92    |
| Tominian       | 178,986 | 88,059  | 52  | 4,414.16 | 229,536.44 | 119,483.86 | 110,052.59   | 242,859.19   | (13,322.75)  |
| <b>Sikasso</b> |         |         |     |          |            |            |              |              |              |
| Bougouni       | 346,208 | 151,813 | 146 | 4,739.33 | 691,942.77 | 497,786.61 | 194,156.16   | 1,135,197.29 | (443,254.52) |
| Kadiolo        | 127,615 | 53,337  | 72  | 4,739.33 | 341,232.05 | 360,615.42 | (19,383.37)  | 862,814.49   | (521,582.44) |
| Kignan         | 91,422  | 37,969  | 52  | 4,739.33 | 246,445.37 | 170,224.26 | 76,221.11    | 409,867.05   | (163,421.68) |
| Kolondieba     | 164,598 | 71,600  | 81  | 4,739.33 | 383,886.06 | 354,668.33 | 29,217.73    | 815,330.97   | (431,444.91) |
| Koutiala       | 317,519 | 105,867 | 92  | 4,739.33 | 436,018.73 | 188,375.63 | 247,643.10   | 564,980.97   | (128,962.24) |
| Niena          | 93,608  | 35,123  | 50  | 4,739.33 | 236,966.70 | 159,704.50 | 77,262.20    | 425,636.16   | (188,669.46) |
| Selingue       | 31,132  | 13,542  | 18  | 4,739.33 | 85,308.01  | 93,259.01  | (7,951.00)   | 214,395.17   | (129,087.16) |
| Sikasso        | 245,991 | 90,253  | 76  | 4,739.33 | 360,189.39 | 250,156.81 | 110,032.58   | 681,820.26   | (321,630.87) |
| Yanfolila      | 76,355  | 33,214  | 35  | 4,739.33 | 165,876.69 | 120,490.36 | 45,386.33    | 276,992.87   | (111,116.18) |
| Yorosso        | 127,896 | 55,635  | 38  | 4,739.33 | 180,094.69 | 419,312.97 | (239,218.27) | 963,933.70   | (783,839.01) |
